# Supplementary material for: A latent clinical-anatomical dimension relating metabolic syndrome to brain structure and cognition
Source: bioRxiv preprint, doi:10.1101/2023.02.22.529531, version 5 (2023-12-23)
Supplement: fsLR_t-statistic_group_comparison [file 529531_file11.csv]

	t_values_fslr_ukb_hchs
0	-0.407604573
1	-3.019116537
2	1.725697604
3	-3.953459735
4	-2.91491564
5	-3.653023652
6	0.575541377
7
8	0.959431433
9	-1.793471427
10	3.541594576
11	6.06994586
12	0.002370871
13	0.53037875
14	1.036335575
15	1.382740934
16	1.484812269
17	1.39037944
18	1.174047871
19	0.904649422
20	0.678130676
21	0.612416501
22	0.728520041
23	0.90845433
24	1.099411657
25	1.321069767
26	1.543295841
27
28
29
30
31
32
33
34
35
36
37
38
39
40
41
42
43
44
45
46
47
48
49
50
51
52
53
54
55
56
57
58
59
60
61
62
63
64
65
66
67
68	-0.158513099
69	0.118460405
70	0.353936535
71	0.52183071
72	0.571301152
73	0.499332228
74	0.367949981
75	0.101126558
76	-0.178606718
77	-0.462048764
78	-0.716561288
79	-0.94284392
80	-1.163210261
81	-1.358561507
82	-1.529482203
83	-1.68959825
84	-1.843158236
85	-1.984965929
86	-2.119129279
87	-2.188655128
88	-2.164846637
89	-2.071627973
90	-1.923011901
91	-1.633028644
92	-1.224100274
93	-0.740041706
94	-0.218934622
95	0.259269902
96	0.669172261
97	0.997966938
98	1.276350888
99	1.448110792
100	1.568999191
101	1.633774365
102	1.595209378
103	1.505339972
104	1.351879705
105	1.111946755
106	0.777206967
107	0.385670617
108	-0.02850111
109	-0.416211252
110	-0.71587068
111	-0.9007713
112	-0.968223428
113	-0.931308161
114	-0.875792395
115	-0.794100138
116	-0.706547555
117	-0.633282762
118	-0.542092852
119	-0.368852547
120	-0.092730738
121	0.190859631
122	0.512247392
123	0.775953045
124
125
126
127
128
129
130
131
132
133
134
135
136
137
138
139
140
141
142
143
144
145
146
147
148
149
150
151
152
153
154
155
156
157
158
159
160
161
162
163
164
165
166
167	2.257908511
168	2.124928632
169	1.903277618
170	1.670834248
171	1.435053695
172	1.206556841
173	0.943428408
174	0.653493814
175	0.38608664
176	0.253737553
177	0.265868327
178	0.488555943
179	0.685677742
180	0.347457162
181	0.892618985
182	1.313284837
183	1.504842732
184	1.505189953
185	1.361609309
186	1.128346481
187	0.920229575
188	0.847724253
189	0.845948308
190	1.026085453
191	1.160407913
192	1.322148449
193	1.497357252
194
195
196
197
198
199
200
201
202
203
204
205
206
207
208
209
210
211
212
213
214
215
216
217
218
219
220
221
222
223
224
225
226
227
228
229
230
231
232
233
234
235	0.621440458
236	1.102315361
237	1.394583336
238	1.466995103
239	1.406383657
240	1.247373392
241	1.036858638
242	0.948674726
243	0.86088992
244	1.001971728
245	1.117730367
246	1.24904547
247	1.395783935
248	1.535230554
249
250
251
252
253
254
255
256
257
258
259
260
261
262
263
264
265
266
267
268
269
270
271
272
273
274
275
276
277
278
279
280
281
282
283
284
285
286
287
288
289	0.795558768
290	1.162123102
291	1.329700765
292	1.321230905
293	1.203239672
294	1.029952777
295	0.896291284
296	0.780035648
297	0.826676432
298	0.95324434
299	1.081405706
300	1.223953834
301	1.34697413
302
303
304
305
306
307
308
309
310
311
312
313
314
315
316
317
318
319
320
321
322
323
324
325
326
327
328
329
330
331
332
333
334
335
336
337
338
339
340
341
342	0.863140104
343	1.103203525
344	1.147453598
345	1.072470987
346	0.898392092
347	0.681578358
348	0.637427537
349	0.551732303
350	0.65032766
351	0.793578677
352	0.974225852
353
354
355
356
357
358
359
360
361
362
363
364
365
366
367
368
369
370
371
372
373
374
375
376
377
378
379
380
381
382
383
384
385
386
387
388
389
390
391
392
393
394	0.8051059
395	0.905858654
396	0.859506365
397	0.7032548
398	0.451339289
399	0.242655731
400	0.188638804
401	0.222420679
402	0.321713404
403	0.59520831
404	0.895227125
405
406
407
408
409
410
411
412
413
414
415
416
417
418
419
420
421
422
423
424
425
426
427
428
429
430
431
432
433
434
435
436
437
438
439
440
441
442
443
444
445	0.625249804
446	0.603726498
447	0.460872324
448	0.207115658
449	-0.06451247
450	-0.27943891
451	-0.341280458
452	-0.239953583
453	-0.112952743
454
455
456
457
458
459
460
461
462
463
464
465
466
467
468
469
470
471
472
473
474
475
476
477
478
479
480
481
482
483
484
485
486
487
488
489
490
491
492
493
494
495	0.362321744
496	0.233333541
497	-0.023304952
498	-0.352316513
499	-0.655558681
500	-0.874555244
501	-0.922185194
502	-0.657957244
503	-0.40599742
504
505
506
507
508
509
510
511
512
513
514
515
516
517
518
519
520
521
522
523
524
525
526
527
528
529
530
531
532
533
534
535
536
537
538
539
540
541
542
543
544	0.017895526
545	-0.193756274
546	-0.53160192
547	-0.907599398
548	-1.261175489
549	-1.495337941
550	-1.620713403
551
552
553
554
555
556
557
558
559
560
561
562
563
564
565
566
567
568
569
570
571
572
573
574
575
576
577
578
579
580
581
582
583
584
585
586
587
588
589
590
591
592	-0.342212107
593	-0.626378373
594	-1.023782862
595	-1.435616876
596	-1.830685495
597	-2.094987806
598	-2.375429891
599	-2.588708791
600
601
602
603
604
605
606
607
608
609
610
611
612
613
614
615
616
617
618
619
620
621
622
623
624
625
626
627
628
629
630
631
632
633
634
635
636
637
638
639	-0.691214855
640	-1.050998136
641	-1.497944373
642	-1.931062143
643	-2.296582711
644	-2.55099491
645	-2.719440803
646
647
648
649
650
651
652
653
654
655
656
657
658
659
660
661
662
663
664
665
666
667
668
669
670
671
672
673
674
675
676
677
678
679
680
681
682
683
684
685	-1.020145488
686	-1.422284286
687	-1.895082733
688	-2.321581015
689	-2.630802159
690	-2.836692233
691	-2.970433185
692
693
694
695
696
697
698
699
700
701
702
703
704
705
706
707
708
709
710
711
712
713
714
715
716
717
718
719
720
721
722
723
724
725
726
727
728
729
730	-1.288018367
731	-1.708270753
732	-2.173286901
733	-2.578847487
734	-2.844716866
735	-2.997877699
736	-3.083622231
737
738
739
740
741
742
743
744
745
746
747
748
749
750
751
752
753
754
755
756
757
758
759
760
761
762
763
764
765
766
767
768
769
770
771
772
773
774	-1.527995129
775	-1.925003206
776	-2.350756269
777	-2.710933902
778	-2.937072837
779	-3.047050345
780	-3.09301245
781
782
783
784
785
786
787
788
789
790
791
792
793
794
795
796
797
798
799
800
801
802
803
804
805
806
807
808
809
810
811
812
813
814
815
816
817	-1.71203775
818	-2.084882683
819	-2.435897981
820	-2.731486423
821	-2.918010846
822	-2.999252862
823	-3.006062393
824
825
826
827
828
829
830
831
832
833
834
835
836
837
838
839
840
841
842
843
844
845
846
847
848
849
850
851
852
853
854
855
856
857
858
859	-1.836863156
860	-2.165693559
861	-2.458046422
862	-2.688743968
863	-2.823567989
864	-2.861740619
865	-2.82381694
866
867
868
869
870
871
872
873
874
875
876
877
878
879
880
881
882
883
884
885
886
887
888
889
890
891
892
893
894
895
896
897
898
899
900	-1.934287822
901	-2.198356497
902	-2.431143169
903	-2.599449816
904	-2.676290469
905	-2.659686289
906	-2.567207698
907
908
909
910
911
912
913
914
915
916
917
918
919
920
921
922
923
924
925
926
927
928
929
930
931
932
933
934
935
936
937
938
939
940	-2.01675367
941	-2.206394065
942	-2.370649983
943	-2.468565106
944	-2.48402592
945	-2.404880695
946	-2.217140565
947
948
949
950
951
952
953
954
955
956
957
958
959
960
961
962
963
964
965
966
967
968
969
970
971
972
973
974
975
976
977
978
979	-2.090686625
980	-2.205474925
981	-2.290210259
982	-2.310688879
983	-2.253176632
984	-2.107269299
985	-1.891366623
986	-1.672515362
987
988
989
990
991
992
993
994
995
996
997
998
999
1000
1001
1002
1003
1004
1005
1006
1007
1008
1009
1010
1011
1012
1013
1014
1015
1016
1017	-2.160236045
1018	-2.196417126
1019	-2.1860966
1020	-2.118853741
1021	-1.979664838
1022	-1.772445003
1023	-1.509310345
1024	-1.219410648
1025
1026
1027
1028
1029
1030
1031
1032
1033
1034
1035
1036
1037
1038
1039
1040
1041
1042
1043
1044
1045
1046
1047
1048
1049
1050
1051
1052
1053
1054	-2.174063374
1055	-2.13180336
1056	-2.034643191
1057	-1.873954653
1058	-1.653998212
1059	-1.373273859
1060	-1.023982159
1061	-0.560965313
1062	0.037209498
1063
1064
1065
1066
1067
1068
1069
1070
1071
1072
1073
1074
1075
1076
1077
1078
1079
1080
1081
1082
1083
1084
1085
1086
1087
1088
1089
1090	-2.099649711
1091	-1.994698273
1092	-1.812720138
1093	-1.565754875
1094	-1.261396555
1095	-0.91010985
1096	-0.481286237
1097	-0.027359741
1098	0.37531769
1099
1100
1101
1102
1103
1104
1105
1106
1107
1108
1109
1110
1111
1112
1113
1114
1115
1116
1117
1118
1119
1120
1121
1122
1123
1124
1125	-1.959329258
1126	-1.766491141
1127	-1.502996312
1128	-1.176915909
1129	-0.798294012
1130	-0.380945302
1131	0.045407553
1132	0.443010377
1133	0.789890171
1134	1.10785523
1135	1.409201005
1136
1137
1138
1139
1140
1141
1142
1143
1144
1145
1146
1147
1148
1149
1150
1151
1152
1153
1154
1155
1156
1157
1158
1159	-1.730879236
1160	-1.453601159
1161	-1.10115657
1162	-0.701171356
1163	-0.275500572
1164	0.151702682
1165	0.55269353
1166	0.901549451
1167	1.20603894
1168	1.456787185
1169	1.656315499
1170
1171
1172
1173
1174
1175
1176
1177
1178
1179
1180
1181
1182
1183
1184
1185
1186
1187
1188
1189
1190
1191
1192	-1.373920534
1193	-1.040730312
1194	-0.626494209
1195	-0.173815822
1196	0.26603269
1197	0.67448724
1198	1.03319629
1199	1.33395925
1200	1.575051856
1201	1.757810511
1202	1.877818724
1203
1204
1205
1206
1207
1208
1209
1210
1211
1212
1213
1214
1215
1216
1217
1218
1219
1220
1221
1222
1223
1224	-0.927264741
1225	-0.539178789
1226	-0.098749017
1227	0.355739174
1228	0.775066359
1229	1.152456098
1230	1.464345518
1231	1.713361408
1232	1.902533435
1233	2.037647413
1234	2.152638165
1235
1236
1237
1238
1239
1240
1241
1242
1243
1244
1245
1246
1247
1248
1249
1250
1251
1252
1253
1254
1255	-0.422988018
1256	-0.013382925
1257	0.423401982
1258	0.854384866
1259	1.236759118
1260	1.567930606
1261	1.830990312
1262	2.035910624
1263	2.185738958
1264	2.2954267
1265	2.394278532
1266
1267
1268
1269
1270
1271
1272
1273
1274
1275
1276
1277
1278
1279
1280
1281
1282
1283
1284
1285	0.096070823
1286	0.485695757
1287	0.894260774
1288	1.286669298
1289	1.625600144
1290	1.910815658
1291	2.135996131
1292	2.3059371
1293	2.425060549
1294	2.513121739
1295	2.591556909
1296	2.633478192
1297
1298
1299
1300
1301
1302
1303
1304
1305
1306
1307
1308
1309
1310
1311
1312
1313
1314	0.566456944
1315	0.918019479
1316	1.280731562
1317	1.630092138
1318	1.927316647
1319	2.176858119
1320	2.375007809
1321	2.519977296
1322	2.6201851
1323	2.680842692
1324	2.703399061
1325
1326
1327
1328
1329
1330
1331
1332
1333
1334
1335
1336
1337
1338
1339
1340
1341
1342	0.926950425
1343	1.225604686
1344	1.556867018
1345	1.871323027
1346	2.138677126
1347	2.36618039
1348	2.548918228
1349	2.679382129
1350	2.765108393
1351	2.805119578
1352	2.801724486
1353	2.770086572
1354
1355
1356
1357
1358
1359
1360
1361
1362
1363
1364
1365
1366
1367
1368
1369	1.194794905
1370	1.433413267
1371	1.720446024
1372	2.016926972
1373	2.270845163
1374	2.489937094
1375	2.664344699
1376	2.782161787
1377	2.852426305
1378	2.862337811
1379	2.801310584
1380	2.753259695
1381
1382
1383
1384
1385
1386
1387
1388
1389
1390
1391
1392
1393
1394
1395	1.369896084
1396	1.550822537
1397	1.805634567
1398	2.081328558
1399	2.341433061
1400	2.55359198
1401	2.715780398
1402	2.820189432
1403	2.869583834
1404	2.850333197
1405	2.756952196
1406	2.692109193
1407
1408
1409
1410
1411
1412
1413
1414
1415
1416
1417
1418
1419
1420	1.471213231
1421	1.597144629
1422	1.841385375
1423	2.095772543
1424	2.351670155
1425	2.555283609
1426	2.693041619
1427	2.777361363
1428	2.803320667
1429	2.766955722
1430	2.65199922
1431	2.56553772
1432
1433
1434
1435
1436
1437
1438
1439
1440
1441
1442
1443
1444	1.53372248
1445	1.617864904
1446	1.837861639
1447	2.07577738
1448	2.306514905
1449	2.482957703
1450	2.585035778
1451	2.640508182
1452	2.643228337
1453	2.597486265
1454	2.473677464
1455
1456
1457
1458
1459
1460
1461
1462
1463
1464
1465
1466
1467	1.551873798
1468	1.619113289
1469	1.813937403
1470	2.014831768
1471	2.201671219
1472	2.325583089
1473	2.384772423
1474	2.402601942
1475	2.382226255
1476	2.339764437
1477	2.225281931
1478	2.116202184
1479
1480
1481
1482
1483
1484
1485
1486
1487
1488
1489	1.519191183
1490	1.574684156
1491	1.741413385
1492	1.905923546
1493	2.021872757
1494	2.073232453
1495	2.085607452
1496	2.067786531
1497	2.039094115
1498	2.011509838
1499	1.933126801
1500
1501
1502
1503
1504
1505
1506
1507
1508
1509
1510	1.430820618
1511	1.473499844
1512	1.587338299
1513	1.685434219
1514	1.739070402
1515	1.738008172
1516	1.70469712
1517	1.669848945
1518	1.653867324
1519	1.659418766
1520	1.641826792
1521
1522
1523
1524
1525
1526
1527
1528
1529
1530	1.277191467
1531	1.29351983
1532	1.357106163
1533	1.378496681
1534	1.37398583
1535	1.334330715
1536	1.277560486
1537	1.257460588
1538	1.275915499
1539	1.33396184
1540	1.402548146
1541	1.430086338
1542
1543
1544
1545
1546
1547
1548
1549	1.03917088
1550	1.020499191
1551	1.041219264
1552	1.020603651
1553	0.973907916
1554	0.913070414
1555	0.872985642
1556	0.883786521
1557	0.951191157
1558	1.072706374
1559	1.238876916
1560	1.353839536
1561
1562
1563
1564
1565
1566
1567	0.711618262
1568	0.68323338
1569	0.683162357
1570	0.642347497
1571	0.58187266
1572	0.537420951
1573	0.532372992
1574	0.587472376
1575	0.706597763
1576	0.898349305
1577	1.145305939
1578	1.345671197
1579	1.444718016
1580
1581
1582
1583
1584	0.331691705
1585	0.312946776
1586	0.325449112
1587	0.297298583
1588	0.255143629
1589	0.23214246
1590	0.272121536
1591	0.372731232
1592	0.546754159
1593	0.789204859
1594	1.103213778
1595	1.370829323
1596	1.526087097
1597
1598
1599
1600	-0.041370197
1601	-0.024080316
1602	0.006461011
1603	-0.002087331
1604	-0.012576217
1605	0.007220194
1606	0.088690106
1607	0.23495856
1608	0.452593893
1609	0.734468487
1610	1.104334583
1611	1.42201129
1612	1.618839574
1613
1614
1615	-0.380545592
1616	-0.318515764
1617	-0.260144919
1618	-0.236915462
1619	-0.200753166
1620	-0.133737299
1621	-0.001921736
1622	0.192158441
1623	0.425580041
1624	0.741902435
1625	1.144289219
1626	1.510899128
1627
1628
1629	-0.641602876
1630	-0.545391101
1631	-0.472905143
1632	-0.41115494
1633	-0.324939203
1634	-0.199666649
1635	-0.020388786
1636	0.191117957
1637	0.452525207
1638	0.802857243
1639	1.230219344
1640	1.650056024
1641
1642	-0.809330091
1643	-0.717892887
1644	-0.61576158
1645	-0.515550311
1646	-0.384980941
1647	-0.209297833
1648	-0.010050972
1649	0.225968559
1650	0.533863594
1651	0.929420912
1652	1.38378003
1653	1.855632054
1654	-0.910611556
1655	-0.820123018
1656	-0.706560003
1657	-0.573658509
1658	-0.409547126
1659	-0.197431856
1660	0.04259882
1661	0.330483206
1662	0.682482186
1663	1.114611932
1664	1.610031038
1665	-0.945139679
1666	-0.890725266
1667	-0.781871515
1668	-0.6160612
1669	-0.418661777
1670	-0.162595835
1671	0.134729157
1672	0.472963064
1673	0.886690097
1674	1.364737608
1675	-0.940646991
1676	-0.927700731
1677	-0.828613073
1678	-0.64965949
1679	-0.402353737
1680	-0.102858166
1681	0.249170445
1682	0.666303341
1683	1.138862491
1684	-0.928436637
1685	-0.929626647
1686	-0.838331094
1687	-0.654799262
1688	-0.363255938
1689	-0.006454154
1690	0.429700828
1691	0.916077187
1692	-0.893790081
1693	-0.901122781
1694	-0.811023289
1695	-0.607262545
1696	-0.268818575
1697	0.161190447
1698	0.664820157
1699	-0.832123966
1700	-0.814339754
1701	-0.714803653
1702	-0.469104612
1703	-0.103200311
1704	0.385274632
1705	-0.693245971
1706	-0.660643501
1707	-0.548285781
1708	-0.257928925
1709	0.126935278
1710	-0.472162608
1711	-0.429827822
1712	-0.289342279
1713	0.002532976
1714	-0.208004505
1715	-0.113049333
1716	-0.000466858
1717	0.112799886
1718	0.212885509
1719	0.425743512
1720	-0.407829117
1721	-0.395199398
1722	-0.379992324
1723	-0.367177112
1724	-0.324646308
1725	-0.283329363
1726	-0.239768075
1727	-0.122211989
1728	0.125905573
1729	0.450118439
1730	0.864480857
1731	1.349817114
1732	1.828991399
1733	2.229949957
1734	2.489866181
1735	2.694677326
1736	2.816351615
1737	2.835549539
1738	2.764174823
1739	2.697075728
1740	2.597201395
1741	2.538098179
1742	2.563893992
1743	2.688555851
1744	2.913531468
1745	3.176728816
1746	3.508293424
1747	3.837214604
1748	4.15189265
1749	4.434390802
1750	4.665014917
1751	4.802198455
1752	4.814446459
1753	4.698880055
1754	4.493899543
1755	4.286474799
1756	4.079990326
1757	3.952836971
1758	3.894575008
1759	3.877518895
1760	3.847888232
1761	3.74122246
1762	3.496057562
1763	3.120234925
1764	2.642194226
1765	2.106039703
1766	1.561830645
1767	0.991364888
1768	0.438609141
1769	-0.076265264
1770	-0.600655301
1771	-1.182838274
1772	-1.785296954
1773	-2.426364508
1774	-3.053002712
1775	-3.601675991
1776	-3.774082589
1777	-3.465714399
1778	-3.120436841
1779	-2.727101621
1780	-2.317989669
1781	-1.903033558
1782	-1.44820354
1783	-0.950682086
1784	-0.405191117
1785	0.204516016
1786	0.850878321
1787	1.522977638
1788	2.198497676
1789	2.878186337
1790	3.494258707
1791	4.018436401
1792	4.473363821
1793	4.801005827
1794	5.007961407
1795	5.064784605
1796	5.047301826
1797	5.004092578
1798	5.000758484
1799	5.075950711
1800	5.229445423
1801	5.419552292
1802	5.573986583
1803	5.680926624
1804	5.695902394
1805	5.644928464
1806	5.525566809
1807	5.351438048
1808	5.109751988
1809	4.789816342
1810	4.412509122
1811	3.989312446
1812	3.524417086
1813	3.052130901
1814	2.624942278
1815	2.257714996
1816	1.958566511
1817	1.692385616
1818
1819
1820
1821
1822
1823
1824
1825
1826
1827
1828
1829
1830
1831
1832	0.090817186
1833	0.113006951
1834	0.118246884
1835	0.13217411
1836	0.108232287
1837	0.07982993
1838	0.097260593
1839	0.228473194
1840	0.502002925
1841	0.872262946
1842	1.33295286
1843	1.845310533
1844	2.333691426
1845	2.699459708
1846	2.9662972
1847	3.151034511
1848	3.202567198
1849	3.151315762
1850	3.056010525
1851	2.916068342
1852	2.790652143
1853	2.713852805
1854	2.752600841
1855	2.873253371
1856	3.057563498
1857	3.326702207
1858	3.638364331
1859	3.96162453
1860	4.300412929
1861	4.612121311
1862	4.866851019
1863	5.006808794
1864	4.988768457
1865	4.848510391
1866	4.639703716
1867	4.402615946
1868	4.202831551
1869	4.086008402
1870	4.044702374
1871	4.024455913
1872	3.972435026
1873	3.802203914
1874	3.50384741
1875	3.080015642
1876	2.579568859
1877	2.03390516
1878	1.446978636
1879	0.875831356
1880	0.323580873
1881	-0.22365581
1882	-0.776280521
1883	-1.353613331
1884	-1.995113637
1885	-2.631511763
1886	-3.251080971
1887	0.60561235
1888	0.615761662
1889	0.608846925
1890	0.545417894
1891	0.443408996
1892	0.367395441
1893	0.380524631
1894	0.564278685
1895	0.886296112
1896	1.308276795
1897	1.81321288
1898	2.341100167
1899	2.806725622
1900	3.167805965
1901	3.430599107
1902	3.548588196
1903	3.541761795
1904	3.456855027
1905	3.322092595
1906	3.16630576
1907	3.009329172
1908	2.942057198
1909	2.961212755
1910	3.051503485
1911	3.211595469
1912	3.474790478
1913	3.780530423
1914	4.127550165
1915	4.469117167
1916	4.81361898
1917	5.07856493
1918	5.215586445
1919	5.187233548
1920	5.03264264
1921	4.80290949
1922	4.557585423
1923	4.360178624
1924	4.245062002
1925	4.200008988
1926	4.157816142
1927	4.054444976
1928	3.826049658
1929	3.484046035
1930	3.032454286
1931	2.499579676
1932	1.910450924
1933	1.316223167
1934	0.724793592
1935	0.143613683
1936	-0.405906285
1937	-0.960391487
1938	-1.583651426
1939	-2.225578429
1940	-2.878858787
1941	1.063682908
1942	1.041481226
1943	0.926937077
1944	0.776926256
1945	0.634218548
1946	0.557366173
1947	0.615943407
1948	0.863357042
1949	1.23810313
1950	1.71479415
1951	2.248134615
1952	2.763225877
1953	3.220161055
1954	3.57113676
1955	3.804016013
1956	3.867586955
1957	3.828807779
1958	3.725821593
1959	3.565182244
1960	3.379985914
1961	3.234733624
1962	3.158083042
1963	3.147214628
1964	3.201725648
1965	3.367803415
1966	3.611793883
1967	3.922935044
1968	4.26937375
1969	4.653304118
1970	5.007911086
1971	5.272658543
1972	5.390004086
1973	5.364186294
1974	5.188839703
1975	4.941533971
1976	4.702220538
1977	4.516969805
1978	4.417661998
1979	4.350355473
1980	4.263671122
1981	4.108783427
1982	3.842702256
1983	3.460384637
1984	2.964690765
1985	2.378664198
1986	1.756993872
1987	1.147435842
1988	0.538621463
1989	-0.038512022
1990	-0.614543014
1991	-1.198114465
1992	-1.829402389
1993	-2.487334559
1994	1.349147935
1995	1.228346883
1996	1.017760007
1997	0.819743102
1998	0.673041456
[truncated: 62,985 more rows]
